# Supplementary material
Source: publisher figshare collection journal article supplement (https://frontiersin.figshare.com/ndownloader/files/34394501)
Supplement: Supplementary file [file 34394501]

## *Supplementary Material*

# What Drives Internet Entrepreneurial Intention to Use Technology Products? An Investigation of Technology Product Imagination Disposition, Social Support, and Motivation

**Appendix A.** Results for exploratory factor analysis of the Technology Product Imagination Disposition Scale.

| Item no. | Original item no. | Item                                                                                                              | Factor               |                     |                |                |
|----------|-------------------|-------------------------------------------------------------------------------------------------------------------|----------------------|---------------------|----------------|----------------|
|          |                   |                                                                                                                   | Practical evaluation | Positive preference | Beyond reality | Positive value |
| 3        | 4                 | I take the practicality of my imagined technology product into consideration.                                     | .792                 |                     |                |                |
| 5        | 6                 | I think of the presentation when imagining my technology product.                                                 | .780                 |                     |                |                |
| 7        | 8                 | I take public acceptance of my technology product into account.                                                   | .639                 |                     |                |                |
| 8        | 9                 | I imagine the appearance and functions of my technology product, the webpage layout, for instance.                | .622                 |                     |                |                |
| 10       | 12                | I imagine my technology product by combining different features, such as material, software, hardware, and so on. | .592                 |                     |                |                |
| 11       | 13                | I evaluate the popularity of my imagined technology product.                                                      | .569                 |                     |                |                |
| 2        | 3                 | I improve my imagination in many ways, such as reading fiction novels, attending creativity courses, and so on.   |                      | .797                |                |                |
| 4        | 5                 | I find it pleasant to imagine technology products.                                                                |                      | .714                |                |                |
| 9        | 10                | I consider that imagining a technology product can spice up our lives.                                            |                      | .644                |                |                |
| 17       | 19                | I find it interesting to imagine a technology product.                                                            |                      | .588                |                |                |

|    |    |                                                                                                     |      |      |
|----|----|-----------------------------------------------------------------------------------------------------|------|------|
| 1  | 2  | I can easily imagine technology products that do not exist.                                         | .824 |      |
| 6  | 7  | I often think about changes in technology products today.                                           | .738 |      |
| 14 | 16 | I often imagine different kinds of tools that humans will use in the future.                        | .582 |      |
| 15 | 17 | I expect customer demand for future technology products.                                            | .567 |      |
| 12 | 14 | I consider that imagination can help to design a new technology product.                            |      | .804 |
| 13 | 15 | I am able to connect things from my imagination as well as a virtual system and objects to reality. |      | .693 |
| 16 | 18 | I consider that imagination can help to create a technology product.                                |      | .518 |

---

Note: Three items were deleted because the factor loadings were lower than 0.5. These items were the following: 1. I can imagine the idea of combining more than two things (such as theme, software, or hardware technology) into new technology products. 2. When I encounter inconvenience when using technology products, I imagine many transformation methods (e.g., how apps are used). 3. When I imagine a technology product, I imagine how it is used.

**Appendix B.** Results for item analysis of the Technology Product Imagination Disposition Scale.

| Factor               | Original item no. | CR value  | Item–total correlation | Corrected item–total correlation | Cronbach’s alpha if item deleted |
|----------------------|-------------------|-----------|------------------------|----------------------------------|----------------------------------|
| Practical evaluation | 4                 | 7.601***  | 0.659***               | 0.604                            | 0.896                            |
|                      | 6                 | 7.384***  | 0.685***               | 0.647                            | 0.895                            |
|                      | 8                 | 8.119***  | 0.641***               | 0.583                            | 0.597                            |
|                      | 9                 | 7.664***  | 0.614***               | 0.546                            | 0.898                            |
|                      | 12                | 10.179*** | 0.719***               | 0.664                            | 0.895                            |
|                      | 13                | 8.513***  | 0.629***               | 0.583                            | 0.897                            |
| Positive preference  | 3                 | 8.903***  | 0.617***               | 0.543                            | 0.899                            |
|                      | 5                 | 8.553***  | 0.687***               | 0.636                            | 0.895                            |
|                      | 10                | 8.418***  | 0.639***               | 0.589                            | 0.897                            |
|                      | 19                | 6.935***  | 0.666***               | 0.598                            | 0.897                            |
| Beyond reality       | 2                 | 5.925***  | 0.582***               | 0.514                            | 0.900                            |
|                      | 7                 | 8.977***  | 0.655***               | 0.613                            | 0.896                            |
|                      | 16                | 7.277***  | 0.553***               | 0.500                            | 0.900                            |
|                      | 17                | 7.494***  | 0.630***               | 0.564                            | 0.898                            |
| Positive value       | 14                | 6.597***  | 0.549***               | 0.481                            | 0.900                            |
|                      | 15                | 6.968***  | 0.660***               | 0.598                            | 0.897                            |
|                      | 18                | 3.788***  | 0.440***               | 0.374                            | 0.903                            |

## Appendix C. Variables and items.

| Variable                                                                         | Item                                                                                                              | Factor loading | Source     |
|----------------------------------------------------------------------------------|-------------------------------------------------------------------------------------------------------------------|----------------|------------|
| Technology product imagination disposition (CA = 0.929, CR = 0.938, AVE = 0.472) |                                                                                                                   |                |            |
| TPID1                                                                            | I can easily imagine technology products that do not exist.                                                       | 0.540          | Lin (2019) |
| TPID2                                                                            | I improve my imagination in many ways, such as reading fiction novels, attending creativity courses, and so on.   | 0.561          |            |
| TPID3                                                                            | I take the practicality of my imagined technology product into consideration.                                     | 0.727          |            |
| TPID4                                                                            | I find it pleasant to imagine technology products.                                                                | 0.750          |            |
| TPID5                                                                            | I think of the presentation when imagining my technology product.                                                 | 0.786          |            |
| TPID6                                                                            | I often think about changes in technology products today.                                                         | 0.698          |            |
| TPID7                                                                            | I take public acceptance of my technology product into account.                                                   | 0.668          |            |
| TPID8                                                                            | I imagine the appearance and functions of my technology product, the webpage layout, for instance.                | 0.624          |            |
| TPID9                                                                            | I consider that imagining a technology product can spice up our lives.                                            | 0.697          |            |
| TPID10                                                                           | I imagine my technology product by combining different features, such as material, software, hardware, and so on. | 0.761          |            |
| TPID11                                                                           | I evaluate the popularity of my imagined technology product.                                                      | 0.706          |            |
| TPID12                                                                           | I consider that imagination can help to design a new technology product.                                          | 0.708          |            |
| TPID13                                                                           | I am able to connect things from my imagination as well as a virtual system and objects to reality.               | 0.701          |            |
| TPID14                                                                           | I often imagine different kinds of tools that humans will use in the future.                                      | 0.643          |            |

|        |                                                                      |       |
|--------|----------------------------------------------------------------------|-------|
| TPID15 | I expect customer demand for future technology products.             | 0.677 |
| TPID16 | I consider that imagination can help to create a technology product. | 0.630 |
| TPID17 | I find it interesting to imagine a technology product.               | 0.753 |

**Social support** (CA = 0.937, CR = 0.945, AVE = 0.489)

|     |                                                                                                    |       |                                  |
|-----|----------------------------------------------------------------------------------------------------|-------|----------------------------------|
| IS1 | Supporters provide experience and tell me how to deal with problems in stressful situations.       | 0.671 | Krause and<br>Markides<br>(1990) |
| IS2 | Supporters suggest what I should do to solve the problem I am facing.                              | 0.670 |                                  |
| IS3 | When I have a problem, a supporter provides me with information that helps to clarify the problem. | 0.699 |                                  |
| IS4 | Supporters help me understand why I'm not doing well.                                              | 0.680 |                                  |
| IS5 | When I have a problem, a supporter tells me whom to ask for help.                                  | 0.605 |                                  |
| IS6 | Supporters analyze the way I deal with the problem without commenting on its quality.              | 0.598 |                                  |
| TS1 | Supporters are willing to give me or lend me more than NT\$1,000.                                  | 0.491 |                                  |
| TS2 | Supporters give me or lend me what I need (materials and goods other than money).                  | 0.650 |                                  |
| TS3 | Supporters are willing to help me do what I need to do, such as making a film.                     | 0.657 |                                  |
| ES1 | Supporters help me when I am under stress.                                                         | 0.771 |                                  |
| ES2 | Supporters tell me that I can.                                                                     | 0.779 |                                  |
| ES3 | Supporters show empathy to comfort me.                                                             | 0.790 |                                  |
| ES4 | Supporters listen to my inner feelings.                                                            | 0.795 |                                  |
| ES5 | Supporters show empathy when we have a heart-to-heart talk.                                        | 0.785 |                                  |
| ES6 | Supporters try to cheer me up in a humorous and witty way.                                         | 0.708 |                                  |
| ES7 | Supporters express their attention and concern for my life.                                        | 0.755 |                                  |
| ES8 | When I have a problem, a supporter will go with me to find someone who can help me.                | 0.693 |                                  |

|     |                                                   |       |  |
|-----|---------------------------------------------------|-------|--|
| ES9 | Supporters keep secret what I talk about to them. | 0.715 |  |
|-----|---------------------------------------------------|-------|--|

**Challenge motivation** (CA = 0.801, CR = 0.864, AVE = 0.565)

|     |                                                          |       |  |
|-----|----------------------------------------------------------|-------|--|
| CH1 | I enjoy tackling problems that are completely new to me. | 0.752 |  |
|-----|----------------------------------------------------------|-------|--|

|     |                                                                                           |       |  |
|-----|-------------------------------------------------------------------------------------------|-------|--|
| CH2 | I like to try to solve the complex problems that internet entrepreneurship may encounter. | 0.856 |  |
|-----|-------------------------------------------------------------------------------------------|-------|--|

|     |                                                                                      |       |  |
|-----|--------------------------------------------------------------------------------------|-------|--|
| CH3 | The more difficult the entrepreneurial problem, the more I enjoy trying to solve it. | 0.840 |  |
|-----|--------------------------------------------------------------------------------------|-------|--|

|     |                                                              |       |  |
|-----|--------------------------------------------------------------|-------|--|
| CH4 | Internet entrepreneurship can increase knowledge and skills. | 0.558 |  |
|-----|--------------------------------------------------------------|-------|--|

|     |                                                                                |       |  |
|-----|--------------------------------------------------------------------------------|-------|--|
| CH5 | Curiosity is the main motivation that drives me to start an internet business. | 0.715 |  |
|-----|--------------------------------------------------------------------------------|-------|--|

**Enjoyment motivation** (CA = 0.813, CR = 0.870, AVE = 0.575)

|    |                                                                |       |  |
|----|----------------------------------------------------------------|-------|--|
| E1 | I want to know how well I can do in internet entrepreneurship. | 0.791 |  |
|----|----------------------------------------------------------------|-------|--|

|    |                                     |       |  |
|----|-------------------------------------|-------|--|
| E2 | I like to solve problems by myself. | 0.622 |  |
|----|-------------------------------------|-------|--|

|    |                                                                         |       |  |
|----|-------------------------------------------------------------------------|-------|--|
| E3 | The most important thing for me is to enjoy my entrepreneurial process. | 0.838 |  |
|----|-------------------------------------------------------------------------|-------|--|

|    |                                                                                                                                    |       |  |
|----|------------------------------------------------------------------------------------------------------------------------------------|-------|--|
| E4 | As long as I feel that I have gained a new experience, I will be satisfied regardless of the results of internet entrepreneurship. | 0.739 |  |
|----|------------------------------------------------------------------------------------------------------------------------------------|-------|--|

|    |                                                                                  |       |  |
|----|----------------------------------------------------------------------------------|-------|--|
| E5 | I am more comfortable when I can set myself goals for internet entrepreneurship. | 0.785 |  |
|----|----------------------------------------------------------------------------------|-------|--|

**Compensation motivation** (CA = 0.811, CR = 0.868, AVE = 0.570)

|    |                                                            |       |  |
|----|------------------------------------------------------------|-------|--|
| C1 | The income from internet entrepreneurship can motivate me. | 0.742 |  |
|----|------------------------------------------------------------|-------|--|

|    |                                                                               |       |  |
|----|-------------------------------------------------------------------------------|-------|--|
| C2 | If I participate in an internet business competition, I will realize my goal. | 0.773 |  |
|----|-------------------------------------------------------------------------------|-------|--|

|    |                                                                                                                 |       |  |
|----|-----------------------------------------------------------------------------------------------------------------|-------|--|
| C3 | I will consider subsidies or bonuses provided by the government or a competition for internet entrepreneurship. | 0.825 |  |
|----|-----------------------------------------------------------------------------------------------------------------|-------|--|

|    |                                                                                 |       |  |
|----|---------------------------------------------------------------------------------|-------|--|
| C4 | I realize that the government provides subsidies for internet entrepreneurship. | 0.746 |  |
|----|---------------------------------------------------------------------------------|-------|--|

|    |                                                         |       |  |
|----|---------------------------------------------------------|-------|--|
| C5 | I care about the rewards for internet entrepreneurship. | 0.682 |  |
|----|---------------------------------------------------------|-------|--|

Adapted from  
Amabile et al.  
(1994)

Adapted from  
Amabile et al.  
(1994)

Adapted from  
Amabile et al.  
(1994)

**Outward motivation** (CA = 0.797, CR = 0.845, AVE = 0.443)

|    |                                                                                           |       |                                          |
|----|-------------------------------------------------------------------------------------------|-------|------------------------------------------|
| O1 | I believe internet entrepreneurship can be recognized by others.                          | 0.774 | Adapted from<br>Amabile et al.<br>(1994) |
| O2 | I hope other people understand how well I can do in internet entrepreneurship.            | 0.786 |                                          |
| O3 | To me, success means doing better than other people.                                      | 0.618 |                                          |
| O4 | I think it is meaningless if no one knows how well I've done.                             | 0.551 |                                          |
| O5 | I'm concerned about how other people are going to react to my ideas.                      | 0.626 |                                          |
| O6 | I care more about the sense of accomplishment I can get in this job than about what I do. | 0.700 |                                          |
| O7 | I'm worried about what others think of my choice of internet entrepreneurship.            | 0.561 |                                          |

**Internet entrepreneurial intention to use technology products** (CA = 0.934, CR = 0.950, AVE = 0.792)

|      |                                                                                         |       |                          |
|------|-----------------------------------------------------------------------------------------|-------|--------------------------|
| IEI1 | My career goal is to become an internet entrepreneur of technology products.            | 0.875 | Liñán and<br>Chen (2009) |
| IEI2 | I will try my best to create and run my internet business based on technology products. | 0.875 |                          |
| IEI3 | I decided to start my own internet business based on technology products in the future. | 0.930 |                          |
| IEI4 | I have seriously considered starting an internet business based on technology products. | 0.907 |                          |
| IEI5 | In the future, I am willing to start an internet business based on technology products. | 0.860 |                          |

Note: CA: Cronbach's alpha; CR: composite reliability; AVE: average variance extracted.

## References

- Amabile, T.M., Hill, K.G., Hennessey, B.A., and Tighe, E.M. (1994). The Work Preference Inventory: assessing intrinsic and extrinsic motivational orientations. *Journal of Personality and Social Psychology* 66, 950-967.
- Krause, N., and Markides, K. (1990). Measuring social support among older adults. *International Journal of Aging and Human Development* 30, 37-53.
- Liñán, F., and Chen, Y.W. (2009). Development and cross-cultural application of specific instrument to measure entrepreneurial intentions. *Entrepreneurship Theory and Practice* 33, 593-617.
- Lin, M.-H. (2019). *Developing the scale of technology imagination disposition and Its correlation with grit and with Internet addiction*. master's thesis, National Taiwan Normal University.
